# Supplementary material for: De Novo Transcriptome Assembly and Characterization for the Widespread and Stress-Tolerant Conifer Platycladus orientalis
Source: PubMed Central journal article supplement (PMC4755536; doi:10.1371/journal.pone.0148985), 2016-02-16

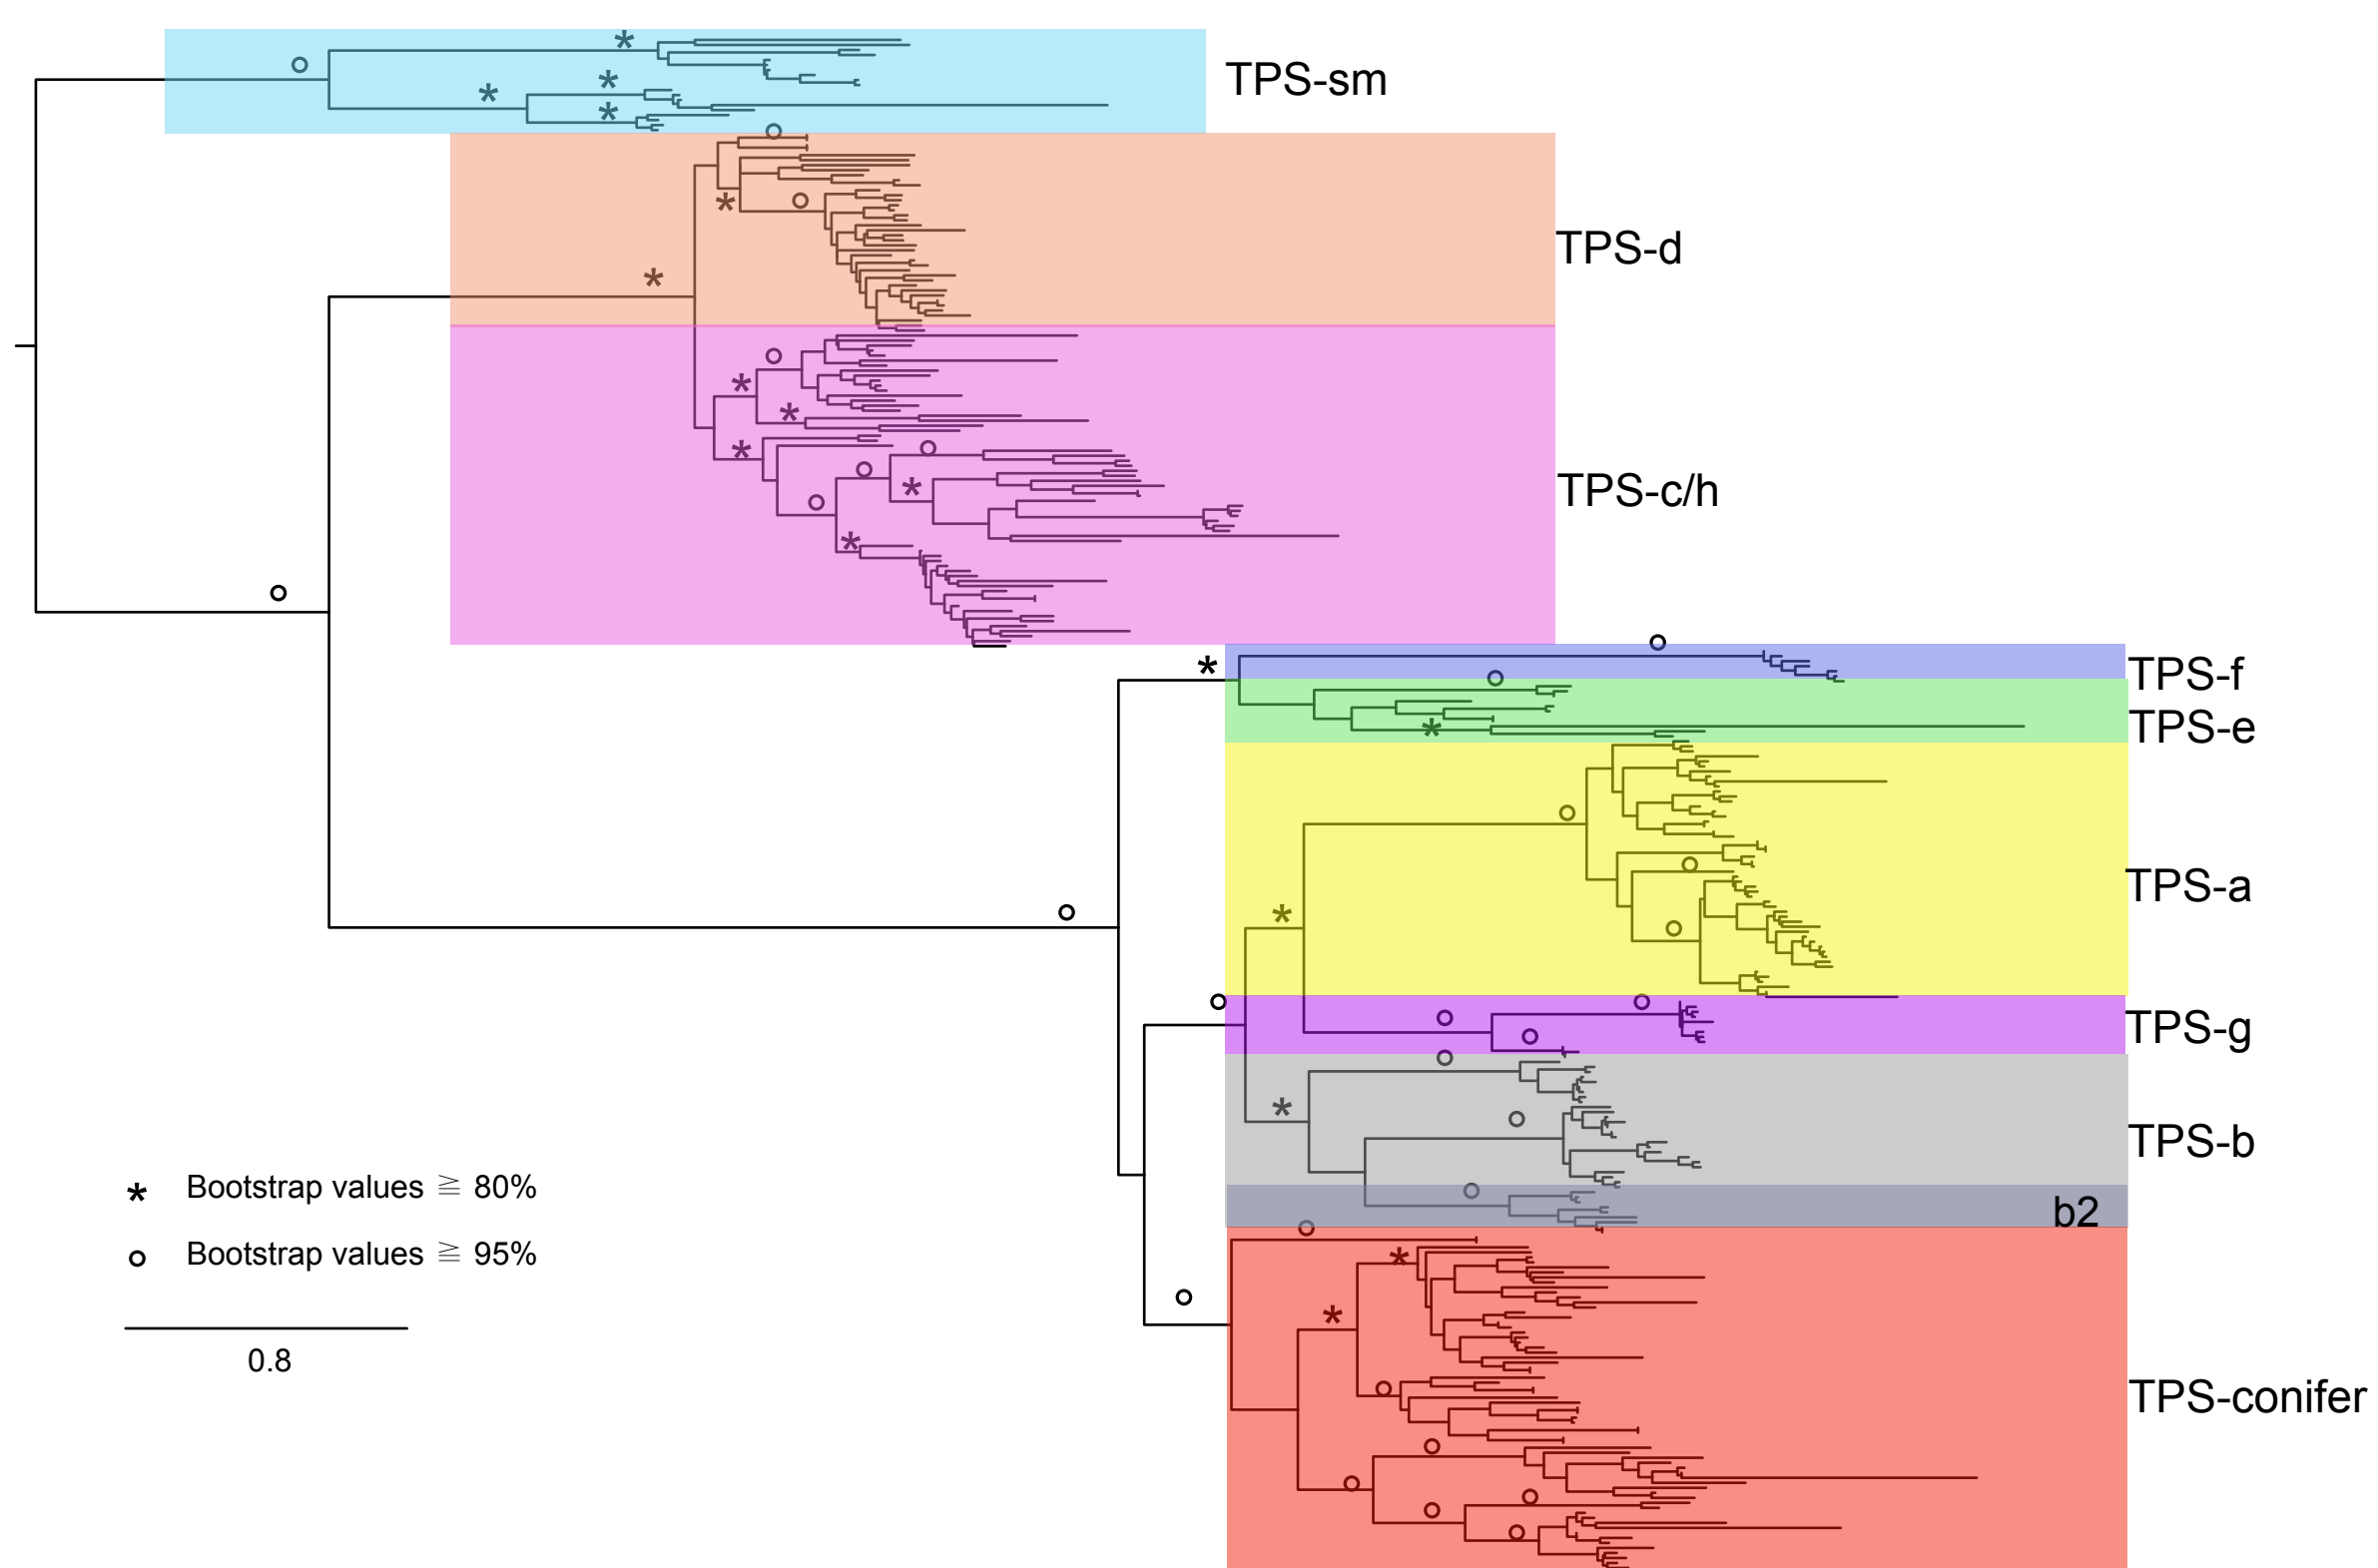

Supplement: pone.0148985.s013.pdf [file pone.0148985.s013.pdf]
